# Supplementary material
Source: ML conference proceedings conference paper supplement (https://openreview.net/forum?id=GO4Sd6LUuY)
Supplement: supplementary_material [file attachment]

000 EXPLICIT-CONSTRAINED SINGLE AGENT FOR  
 001 ENHANCED TASK-SOLVING IN LLMs  
 002 APPENDIX  
 003

004 APPENDIX A  
 005

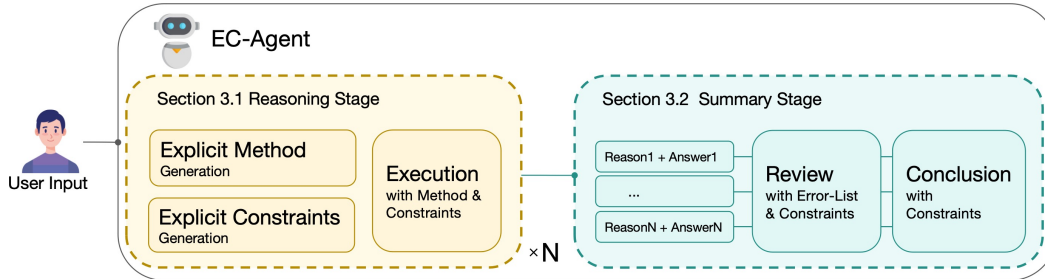

017 Figure 1: The pipeline of EC-Agent.

018  
 019 **EC-Agent Prompt:**

020  
 021 **Reasoning Stage Prompt:**

022 {Task}  
 023 Step 1: Find a method.  
 024 Step 2: List and analyze all the constraints.  
 025 Step 3: Reason step by step, output the answer in the format: "Final Answer is:"  
 026  
 027

028  
 029 **Summary Stage Prompt:**

030 **Review Module:**

031 {Potential Answer}  
 032 {Task}  
 033 Step 1: List common errors in this type of task.  
 034 Step 2: Evaluate and Self-Reflection.  
 035 Step 3: Reason and output modified result.  
 036

037 **Conclusion Module:**

038 {Potential Answer List}  
 039 {Task}  
 040 Step 1: Get result from potential answer, list and summary.  
 041 Step 2: Make a major vote on all potential answers.  
 042 Step 3: If all answers are incomplete, reason out a new one.  
 043 Step 4: Output the final result.  
 044  
 045  
 046  
 047  
 048  
 049  
 050  
 051  
 052  
 053

054  
055  
056  
057  
058  
059  
060  
061  
062  
063  
064  
065  
066  
067  
068  
069  
070  
071  
072  
073  
074  
075  
076  
077  
078  
079  
080  
081  
082  
083  
084  
085  
086  
087  
088  
089  
090  
091  
092  
093  
094  
095  
096  
097  
098  
099  
100  
101  
102  
103  
104  
105  
106  
107

APPENDIX B

TASK 1: 9.8 OR 9.11, WHICH ONE IS BIGGER?

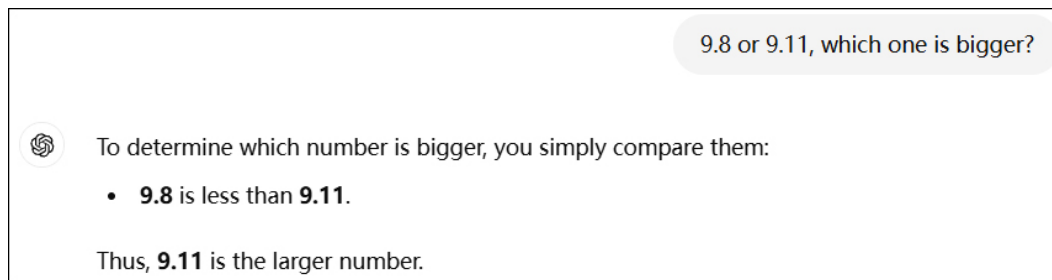

The screenshot shows a chat interface. At the top right, a grey bubble contains the prompt: "9.8 or 9.11, which one is bigger?". Below it, a response from GPT-4o is shown, starting with a circular icon. The response text is: "To determine which number is bigger, you simply compare them:" followed by a bulleted list: "• 9.8 is less than 9.11." and then "Thus, 9.11 is the larger number."

Figure 2: Reasoning by default prompt (GPT-4o).

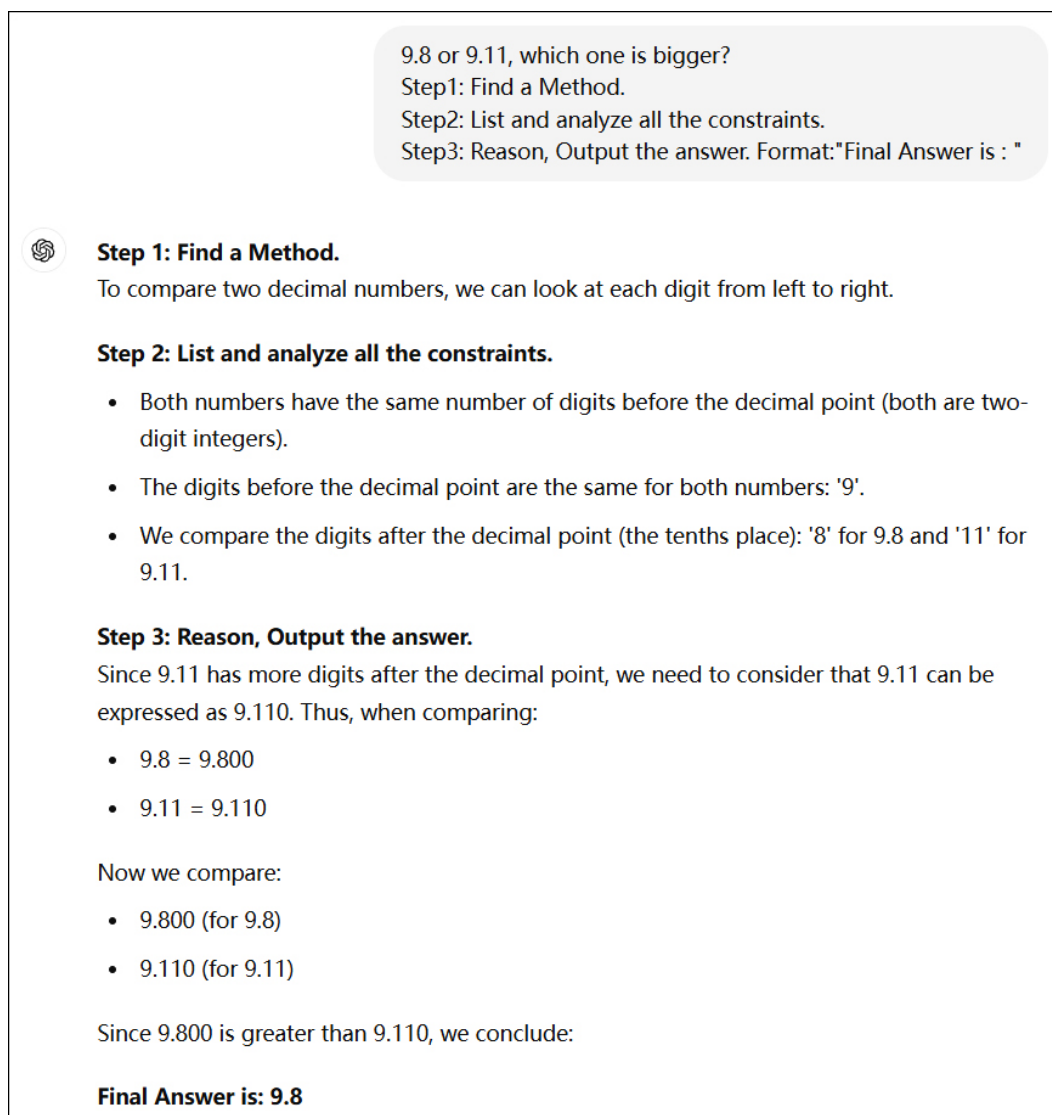

The screenshot shows a chat interface. At the top right, a grey bubble contains the prompt: "9.8 or 9.11, which one is bigger?". Below it, a response from EC-Agent is shown, starting with a circular icon. The response text is: "Step 1: Find a Method. To compare two decimal numbers, we can look at each digit from left to right." followed by "Step 2: List and analyze all the constraints." and a bulleted list: "• Both numbers have the same number of digits before the decimal point (both are two-digit integers).", "• The digits before the decimal point are the same for both numbers: '9'.", and "• We compare the digits after the decimal point (the tenths place): '8' for 9.8 and '11' for 9.11." followed by "Step 3: Reason, Output the answer." and "Since 9.11 has more digits after the decimal point, we need to consider that 9.11 can be expressed as 9.110. Thus, when comparing:" followed by a bulleted list: "• 9.8 = 9.800" and "• 9.11 = 9.110". Then "Now we compare:" followed by a bulleted list: "• 9.800 (for 9.8)" and "• 9.110 (for 9.11)". Then "Since 9.800 is greater than 9.110, we conclude:" followed by "Final Answer is: 9.8".

Figure 3: Reasoning by EC-Agent (GPT-4o).

Correct reasoning method and conditional judgments can quickly guide the model to reach accurate conclusions.

108  
109  
110  
111  
112  
113  
114  
115  
116  
117  
118  
119  
120  
121  
122  
123  
124  
125  
126  
127  
128  
129  
130  
131  
132  
133  
134  
135  
136  
137  
138  
139  
140  
141  
142  
143  
144  
145  
146  
147  
148  
149  
150  
151  
152  
153  
154  
155  
156  
157  
158  
159  
160  
161

## TASK 2: EC-AGENT VS STANDARD PROMPT

Compared to the Standard Prompt, EC-Agent, through the control of Explicit Constraints and Explicit Method., enables the LLM to not only generate diverse execution methods and drive subsequent reasoning behaviors of the LLM, but also focuses on the requirements of the Task during the task execution process.

### Task 2.1: Logic Grid Puzzle

Solve the task. Q. There are 4 houses in a row, numbered 1 on the left to 4 on the right. There is one person living in each house. The people in these houses have different characteristics.

- Each person has a different kind of car: one drives a convertible, one drives a minivan, one owns an SUV, and one drives a truck
- Each person ate something different for lunch: one had steak, one ate fried rice, one ate spaghetti, and one had pizza
- Each person has different flowers in their foyer: one has a vase of tulips, one has a rose bouquet, one has a bouquet of lilies, and one has a carnations arrangement
- Each person is eating a different kind of fruit: one is eating mangos, one is eating grapes, one is eating apples, and one is eating oranges
- Each person has a favorite color: one likes green, one likes white, one likes red, and one likes blue

Clues:

- The person who likes green lives in the first house
- The person who had pizza lives directly left of the person who likes blue
- The person who likes red lives somewhere to the right of the person who has a carnations arrangement
- The person who ate fried rice lives in the fourth house
- The person who is eating mangos lives directly left of the person who likes red
- The person who drives a truck does not live in the third house
- The person who ate spaghetti lives somewhere to the right of the person who drives a minivan
- The person who is eating mangos lives directly left of the person who had pizza
- The person who likes red lives somewhere to the left of the person who is eating grapes
- The person who had pizza and the person who has a rose bouquet live directly next to each other
- The person who likes blue and the person who owns an SUV live directly next to each other
- The person who had pizza and the person who is eating apples live directly next to each other

What is the number of the house where the person who had pizza lives?  
Choose one correct room number from those "1,2,3,4."

| EC-Agent                                                                                                                                                                                                                                                                                                                                                                                                                                                                                                                                                                                                                                                                                                                                                                                                                                                                                                                                                                                                                                                                                                                                                                                                                                          | Standard                                                                                                                                                                                                                                                                                                                                                                                                                                                                                                                                                                                                                                                                                                                                                                                                                                                                                                                                                                                                                                  |
|---------------------------------------------------------------------------------------------------------------------------------------------------------------------------------------------------------------------------------------------------------------------------------------------------------------------------------------------------------------------------------------------------------------------------------------------------------------------------------------------------------------------------------------------------------------------------------------------------------------------------------------------------------------------------------------------------------------------------------------------------------------------------------------------------------------------------------------------------------------------------------------------------------------------------------------------------------------------------------------------------------------------------------------------------------------------------------------------------------------------------------------------------------------------------------------------------------------------------------------------------|-------------------------------------------------------------------------------------------------------------------------------------------------------------------------------------------------------------------------------------------------------------------------------------------------------------------------------------------------------------------------------------------------------------------------------------------------------------------------------------------------------------------------------------------------------------------------------------------------------------------------------------------------------------------------------------------------------------------------------------------------------------------------------------------------------------------------------------------------------------------------------------------------------------------------------------------------------------------------------------------------------------------------------------------|
| <pre>## Solving the Puzzle **Step 1. Method** We'll use a combination of deduction and table-building to solve this puzzle. We'll create a table to track the information we know and use the clues to fill in the gaps.  **Step 2. Analyzing Constraints** Here are the key constraints from the clues: - "Location": Houses numbered 1 to 4. - "Characteristics": Car type, lunch, flowers, fruit, favorite color - "Relationships": Direct left/right neighbors, specific orders.  **Step 3. Reasoning** Let's start filling in our table based on the most direct clues:   House   Person   Car   Lunch   Flowers   Fruit   Color    --- --- --- --- --- --- ---    1             Green     2                 3                 4                 4       Fried Rice           4                **Clue 1** Person in house 1 likes green. **Clue 4** Person in house 4 ate fried rice. **Clue 7** Truck driver lives left of lilies.  We can continue filling in the table using these clues and their relationships. For example, clue 2 tells us the pizza eater is directly left of the blue-liker. Clues 9 and 13 help pinpoint the location of pizza and apples eater.  ... (Omitting the reasoning text.)  **Final Answer is: 2**</pre> | <pre>## Solving the Puzzle **Step 1. Method** We can use a systematic approach to solve this puzzle by creating a table and filling it in based on the clues.  **Step 2. Analyzing Constraints** - "House Numbers." We have four houses numbered 1 to 4. - "Characteristics." Each house has a resident with unique characteristics (car, lunch, flowers, fruit, color). - "Clues." The clues provide direct and indirect relationships between these characteristics.  **Step 3. Reasoning** Let's start by filling in the table based on the most direct clues:   House   Car   Lunch   Flowers   Fruit   Color    --- --- --- --- --- ---    1           Green     2               3               4       Fried Rice         4              Now, we can use the remaining clues to deduce further information and fill in the table. For example: - Clue 2: Pizza is left of Blue. - Clue 6: Mangos are left of Red. - Clue 9: Mangos are left of Pizza, and so on.  ... (Omitting the reasoning text.)  **Final Answer is: 2**</pre> |
| <pre>**Step 1. Analyze Potential Answers** All three potential answers arrive at the same conclusion: **Answer 1** Final Answer is: 2 **Answer 2** Final Answer is: 2 **Answer 3** Final Answer is: 2  **Step 2. Major Vote** There's a unanimous agreement among the potential answers.  **Step 3. No Need for Re-reasoning** Since all answers correctly identify the house number, we don't need to re-reason.  **Step 4. Final Result** The person who had pizza lives in "house 2".</pre>                                                                                                                                                                                                                                                                                                                                                                                                                                                                                                                                                                                                                                                                                                                                                    | <p>Here's how to solve this logic puzzle:</p> <p>**1. Use the clues**</p> <p>**Clue 1:** The person who likes green lives in the first house.</p> <p>**Clue 4:** The person who ate fried rice lives in the fourth house.</p> <p>**2. Use Deduction**</p> <p>**Combine Clues:** Look for clues that link different pieces of information. For example, Clue 2 says the pizza eater is left of the blue-liker.</p> <p>**Elimination:** Eliminate possibilities for each house based on the clues.</p> <p>**3. Keep Iterating**</p> <p>Continue combining clues, and making deductions, until you can determine the house number where the person who had pizza lives.</p>                                                                                                                                                                                                                                                                                                                                                                  |

Figure 4: Logic Grid Puzzle Task. The Blue Grid is a task query. The yellow Grid is reason result by EC-Agent, The green Grid is reason result by Standard Prompt.

In Figure4, the "EC-Agent" selected a method of reasoning that combines tables with conditional constraints, based on the requirements of the Task. In the Puzzle task, we compared and analyzed the failure reasons of tasks using the "Standard Prompt" and "EC-Agent". In "EC-Agent", the occurrence of early-termination in reasoning decreased by 60% compared to Standard Prompt (from 20 cases to 8 out of 100 tasks). We believe this is because, after applying the EM&EC instructions, the LLM's reasoning process became more focused.

162  
163  
164  
165  
166  
167  
168  
169  
170  
171  
172  
173  
174  
175  
176  
177  
178  
179  
180  
181  
182  
183  
184  
185  
186  
187  
188  
189  
190  
191  
192  
193  
194  
195  
196  
197  
198  
199  
200  
201  
202  
203  
204  
205  
206  
207  
208  
209  
210  
211  
212  
213  
214  
215

## Task 2.2: Codenames Collaborative

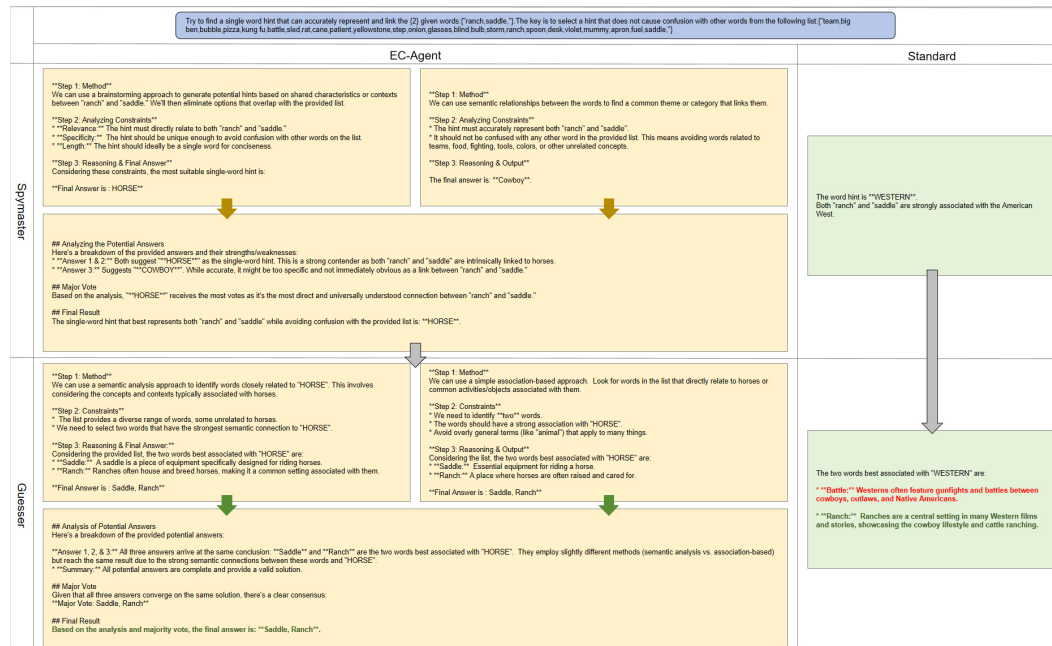

Figure 5: Codenames Collaborative. The Blue Grid is a task query. The yellow Grid is reason result by EC-Agent, The green Grid is reason result by Standard Prompt.

In Task 2.2, EC-Agent can specifically propose constraint conditions based on the Task requirements: "The hint should be unique enough to avoid confusion with other words on the list." And it follows this requirement during the reasoning and generation process: "Considering these constraints, the most suitable single-word hint is...". In Summary Stage, EC-Agent makes the correct choice for different "Potential Answers" by combining the requirements of the Task. In contrast, during the execution of the Standard Prompt, the LLM only considers the interrelationship between the two words "ranch" and "saddle" as required by the Task, ignoring the constraint relationships with other words, which leads to the failure of the final reasoning.

216  
217  
218  
219  
220  
221  
222  
223  
224  
225  
226  
227  
228  
229  
230  
231  
232  
233  
234  
235  
236  
237  
238  
239  
240  
241  
242  
243  
244  
245  
246  
247  
248  
249  
250  
251  
252  
253  
254  
255  
256  
257  
258  
259  
260  
261  
262  
263  
264  
265  
266  
267  
268  
269

### TASK 3: "EXPLICIT METHOD+EXPLICIT CONSTRAINTS" VS "PLAN"

| Try to find a single word hint that can accurately represent and link the [3] given words ("lab,needle,vet"). The key is to select a hint that does not cause confusion with other words from the following list. [speller slip: vet,needle,robin,trip,harm,fall,australia,spell,boost,jack,kangaroo,lab,web,lock,centaur,xtangle,table,dragon,pilot,ruler,battery,jam,cat.] |                                                                                                                                                                                                                                                                                                                                                                                                                                                                                                                                                                                                                                                                                                                                                                                                                                                                                                                                                                                                                                |                                                                                                                                                                                                                                                                                                                                                                                                                                                                                                                                                                                                                     |
|------------------------------------------------------------------------------------------------------------------------------------------------------------------------------------------------------------------------------------------------------------------------------------------------------------------------------------------------------------------------------|--------------------------------------------------------------------------------------------------------------------------------------------------------------------------------------------------------------------------------------------------------------------------------------------------------------------------------------------------------------------------------------------------------------------------------------------------------------------------------------------------------------------------------------------------------------------------------------------------------------------------------------------------------------------------------------------------------------------------------------------------------------------------------------------------------------------------------------------------------------------------------------------------------------------------------------------------------------------------------------------------------------------------------|---------------------------------------------------------------------------------------------------------------------------------------------------------------------------------------------------------------------------------------------------------------------------------------------------------------------------------------------------------------------------------------------------------------------------------------------------------------------------------------------------------------------------------------------------------------------------------------------------------------------|
|                                                                                                                                                                                                                                                                                                                                                                              | EC-Agent                                                                                                                                                                                                                                                                                                                                                                                                                                                                                                                                                                                                                                                                                                                                                                                                                                                                                                                                                                                                                       | Standard                                                                                                                                                                                                                                                                                                                                                                                                                                                                                                                                                                                                            |
| Spmyster                                                                                                                                                                                                                                                                                                                                                                     | <p>""Step 1: Method""<br/>We will analyze the relationships between the given words and identify common themes or actions associated with them. Then, we'll examine the provided list of words to find a single term that accurately reflects this theme without causing confusion with other entries.</p> <p>""Step 2: Constraints""<br/>""Accuracy"" The hint must directly relate to all three words: "lab," "needle," and "vet."<br/>""Specificity"" The hint should be specific enough to avoid ambiguity and clearly point towards the connection between the words.<br/>""Exclusion"" The hint cannot appear in the provided list of distractor words, ensuring no confusion or misinterpretation.</p> <p>""Step 3: Reasoning""<br/>The common thread linking "lab," "needle," and "vet" is the field of "animal healthcare." Vets work in labs, often using needles for examinations and treatments.</p> <p>Considering the constraints, the most suitable single-word hint is:</p> <p>""Final Answer is: HEALTH""</p> | <p>""Step 1: Plan""<br/>The plan is to identify a word that has a direct relationship with at least two of the given words ("lab," "needle," and "vet") without being too closely associated with any other words on the provided list.</p> <p>""Step 2: Reasoning""<br/>1. "Lab" is often associated with scientific experiments and medical procedures.<br/>2. "Needle" is a tool used in both medical procedures and some scientific experiments.<br/>3. "Vet" is a professional who performs medical procedures on animals, often using needles in labs or clinics.</p> <p>""Final Answer is: Examination""</p> |
| Guesser                                                                                                                                                                                                                                                                                                                                                                      | <p>""Step 1: Method""<br/>We can use a simple keyword-based association method. We'll look for words in the list that directly or indirectly relate to health, medicine, or well-being.</p> <p>""Step 2: Constraints""<br/>""Relevance"" The chosen words must have a clear connection to "health."<br/>""Specificity"" We aim for words that are more specific to health than general concepts like "trip" or "table."<br/>""Number"" We need to select only three words.</p> <p>""Step 3: Reasoning""<br/>Considering the constraints, the following three words are best associated with "HEALTH":</p> <p>1. "Vet" - Veterinarians provide healthcare for animals.<br/>2. "Needle" - Used in medical procedures like injections and blood draws.<br/>3. "Lab" - Laboratories conduct tests related to health diagnosis and research.</p> <p>""Final Answer is: vet, needle, lab""</p>                                                                                                                                       | <p>## Step 1: Plan<br/>To identify words best associated with "Examination", we'll look for words that relate to concepts like testing, assessment, or analysis. We'll consider synonyms, related actions, and tools used in examinations.</p> <p>## Step 2: Reasoning<br/>1. "Lab": Laboratories are often associated with scientific examinations and experiments.<br/>2. "Ruler": Rulers are used for measuring and assessing, which can be part of some examinations.<br/>3. "Spell": Spelling tests are a common type of examination.</p> <p>Final Answer is: lab, ruler, spell</p>                            |

Figure 6: "Explicit Method+Explicit Constraints" vs "Plan". The Blue Grid is a task query. The yellow Grid is reason result by EC-Agent, The green Grid is reason result by "Plan" prompt.

#### EM+EC (left):

{ Task }

Step 1: Find a method.

Step 2: List and analyze all the constraints.

Step 3: Reason step by step, output the answer in the format: "Final Answer is:"

#### Plan+CoT (right):

{ Task }

Step 1: Make a plan.

Step 2: Reason step by step, output the answer in the format: "Final Answer is:"

We tested the effect of replacing the prompt keyword "EM&EC" with "Plan," and observed a decline in evaluation results. Our analysis suggests that this is because using the "EM&EC" combination allows the LLM to focus more on the core objectives of the task while reducing reliance on the correctness of the plan. The table below records the test results using different prompts.

270  
271  
272  
273  
274  
275  
276  
277  
278  
279  
280  
281  
282  
283  
284  
285  
286  
287  
288  
289  
290  
291  
292  
293  
294  
295  
296  
297  
298  
299  
300  
301  
302  
303  
304  
305  
306  
307  
308  
309  
310  
311  
312  
313  
314  
315  
316  
317  
318  
319  
320  
321  
322  
323

APPENDIX C

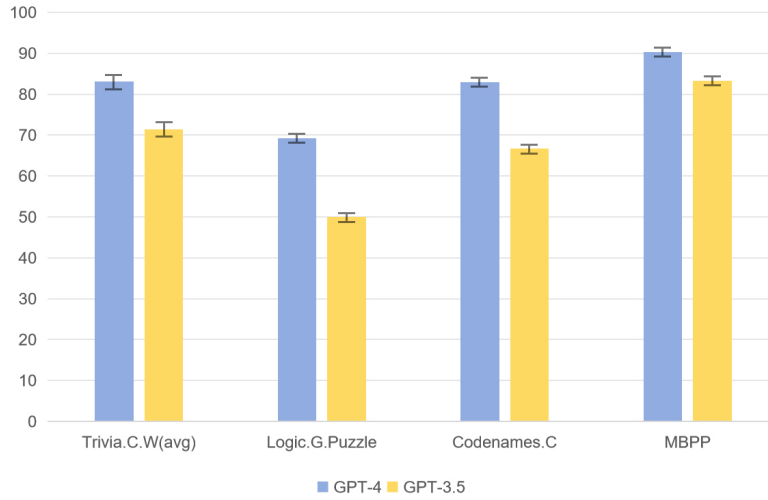

Figure 7: The scores and score variances of different tasks performed by the EC-Agent on OpenAI GPT series models.

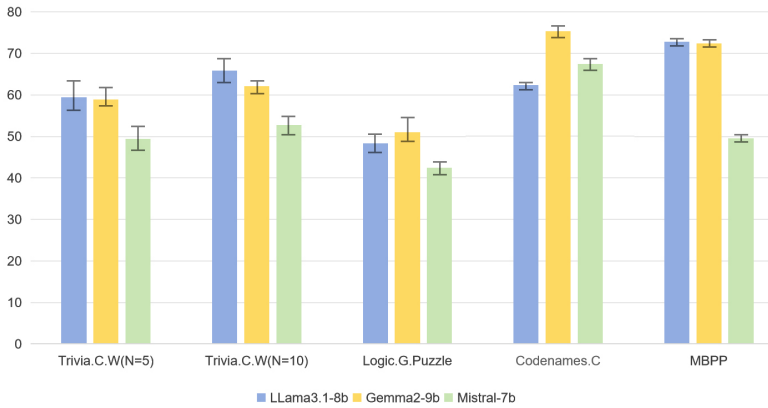

Figure 8: The scores and score variances of different tasks performed by the EC-Agent on multiple open-source models.

Combining numerical analysis, within the EC-Agent framework, some open-source models have reached or slightly surpassed the OpenAI GPT-3.5-0613 model on certain reasoning tasks (e.g., Logic G. Puzzle, Codename C.). However, there remains a significant gap to GPT-4-0613 overall. Additionally, different models also show variations in reasoning stability.
